# Supplementary material
Source: PubMed Central journal article supplement (PMC4813422)
Supplement: DS_101177_0706743716632516.pdf [file DS_101177_0706743716632516.pdf]

| Program Name                                                 | Early Psychosis Treatment Service (Calgary) | EPI (Victoria)                     | NSEPP (Halifax) | TNT (Chatham)  | The Phoenix Program (Oakville) | PEPP - London | CNDV (Quebec City) | Clinique JAP (Montreal) | PEP I.U.S.M.M. (Montreal)      | PEPP – MUHC (Montreal) | PEPP - Montreal |
|--------------------------------------------------------------|---------------------------------------------|------------------------------------|-----------------|----------------|--------------------------------|---------------|--------------------|-------------------------|--------------------------------|------------------------|-----------------|
| Patient to case manager ratio                                | 20-30 to 1                                  | 25 to 1 first year ; 50 to 1 after | 20 to 1         | 20+to 1        | 40 to 1                        | 20 to 1       | 8 to 1             | 30 to 1                 | No case management             | 20 to 1                | 19-23 to 1      |
| Clinic for UHR patients                                      | Yes                                         | No                                 | No              | Yes            | No                             | No            | No                 | No                      | No                             | No                     | Yes             |
| Use of CTO if necessary                                      | Yes                                         | Yes                                | Yes             | Yes            | Yes                            | Yes           | Yes                | Yes                     | Yes                            | Yes                    | Yes             |
| <b>ACCESSIBILITY</b>                                         |                                             |                                    |                 |                |                                |               |                    |                         |                                |                        |                 |
| School, community clinic or self-referral accepted           | Yes                                         | Yes                                | Yes             | Yes            | Yes                            | Yes           | No                 | Yes                     | No                             | Yes                    | Yes             |
| Maximum delay after referral for :                           |                                             |                                    |                 |                |                                |               |                    |                         |                                |                        |                 |
| First contact with patient                                   | No max                                      | 48 hours                           | 1 week          | 48 hours       | 1 week                         | 48 hours      | 1 month            | 24 hours                | 2 weeks                        | 72hours                | 72 hours        |
| Face-to-face full assessment                                 | No max                                      | 1 week                             | 1-2 weeks       | Within 2 weeks | 2 weeks                        | 1 week        | No max             | 2 weeks                 | 60 days (assessment and entry) | 1 week                 | 1 week          |
| Entry into the program                                       | No max                                      | 2 weeks                            | 1-3 weeks       | 4 weeks        | 2 weeks                        | 1 week        | No max             | 2 weeks                 |                                | 2weeks                 | 2 weeks         |
| Average time for entry into the program                      | 4 weeks                                     | 1 week                             | 1-3 weeks       | 4 weeks        | 1 week                         | 1 week        | 2 weeks            | 1 week                  | 1 week                         | 1 week                 | 1 week          |
| <b>Community interventions to reduce delay in treatment:</b> |                                             |                                    |                 |                |                                |               |                    |                         |                                |                        |                 |
| Public education                                             | -                                           | x                                  | x               | x              | x                              | x             | x                  | -                       | x                              | -                      | x               |
| Direct education of sources of referral                      | -                                           | x                                  | x               | x              | x                              | x             | x                  | -                       | -                              | -                      | x               |
| <b>CLINICAL EVALUATION TOOLS</b>                             |                                             |                                    |                 |                |                                |               |                    |                         |                                |                        |                 |
| Formal protocol for initial assessment                       | x                                           | x                                  | x               | x              | x                              | x             | x                  | -                       | -                              | x                      | x               |
| <b>Regular use of standardized evaluation tools :</b>        |                                             |                                    |                 |                |                                |               |                    |                         |                                |                        |                 |
| Positive and negative symptoms (PANSS, SAPS etc.)            | x                                           |                                    | x               | x              | x                              | x             | x                  | x                       | -                              | x                      | x               |
| Functioning (GAF or SOFAS)                                   | x                                           |                                    | x               | x              | x                              | x             | x                  | x                       | -                              | x                      | x               |
| SCID                                                         | x                                           |                                    | -               | x              | -                              | x             | x                  | -                       | -                              | -                      | x               |
| Substance use assessment                                     | -                                           | -                                  | x               | x              | -                              | -             | x                  | x                       | -                              |                        | -               |
| Early warning signs of relapse                               | -                                           | -                                  | -               | x              | -                              | -             | -                  | -                       | -                              | x                      | x               |
| Formal evaluation of risk of relapse                         | -                                           | -                                  | -               | x              | -                              | x             | -                  | -                       |                                | -                      | -               |

| Program Name                                                   | Early Psychosis Treatment Service (Calgary) | EPI (Victoria) | NSEPP (Halifax) | TNT (Chatham) | The Phoenix Program (Oakville) | PEPP - London | CNDV (Quebec City) | Clinique JAP (Montreal) | PEP I.U.S.M.M. (Montreal) | PEPP – MUHC (Montreal) | PEPP - Montreal |
|----------------------------------------------------------------|---------------------------------------------|----------------|-----------------|---------------|--------------------------------|---------------|--------------------|-------------------------|---------------------------|------------------------|-----------------|
| PROGRAM EVALUATION                                             |                                             |                |                 |               |                                |               |                    |                         |                           |                        |                 |
| Formal process for evaluation of patient and treatment outcome | -                                           | x              | x               | x             | x                              | x             | x                  | x                       | -                         | -                      | x               |
| Evaluation for quality assurance                               | -                                           | x              | x               | x             | x                              | x             | x                  | -                       | x                         | -                      | x               |
| EDUCATION AND RESEARCH                                         |                                             |                |                 |               |                                |               |                    |                         |                           |                        |                 |
| Continuing education within program                            | No                                          | Yes            | Yes             | Yes           | No                             | Yes           | Yes                | Yes                     | Yes                       | No                     | Yes             |
| Training (teaching and clinical rotations)                     |                                             |                |                 |               |                                |               |                    |                         |                           |                        |                 |
| Psychiatry residents                                           | Yes                                         | Yes            | Yes             | Yes           | Yes                            | Yes           | Yes                | Yes                     | Yes                       | Yes                    | Yes             |
| Non-psychiatry residents                                       | No                                          | No             | No              | Yes           | No                             | Yes           | No                 | No                      | No                        | No                     | Yes             |
| Medical students                                               | Yes                                         | Yes            | Yes             | Yes           | Yes                            | Yes           | Yes                | Yes                     | Yes                       | No                     | Yes             |
| Nursing students                                               | Yes                                         | Yes            | Yes             | Yes           | Yes                            | Yes           | Yes                | Yes                     | Yes                       | Yes                    | Yes             |
| Social work students                                           | Yes                                         | Yes            | Yes             | Yes           | No                             | Yes           | Yes                | Yes                     | Yes                       | Yes                    | Yes             |
| Occupational therapy students                                  | Yes                                         | No             | Yes             | Yes           | No                             | No            | Yes                | Yes                     | Yes                       | No                     | No              |
| Psychology interns                                             | Yes                                         | Yes            | No              | No            | No                             | Yes           | Yes                | No                      | Yes                       | No                     | Yes             |
| Graduate students                                              | No                                          | Yes            | Yes             | No            | No                             | No            | Yes                | Yes                     | Yes                       | No                     | No              |
| Clinical fellows                                               | No                                          | No             | Yes             | No            | No                             | No            | No                 | Yes                     | No                        | Yes                    | Yes             |
| Research fellows                                               | No                                          | No             | Yes             | No            | No                             | No            | Yes                | Yes                     | No                        | No                     | Yes             |
| Research within program                                        | Yes                                         | Yes            | Yes             | Yes           | No                             | Yes           | Yes                | Yes                     | Yes                       | Yes                    | Yes             |
| Funding of research                                            |                                             |                |                 |               |                                |               |                    |                         |                           |                        |                 |
| Industry                                                       | X                                           | X              | X               | X             | -                              | X             | X                  | -                       | X                         | X                      | X               |
| Peer review                                                    | X                                           | -              | X               | x             | -                              | X             | X                  | -                       | X                         | X                      | X               |
| Grants or fund raising                                         | -                                           | -              | X               | -             | -                              | X             | X                  | X                       | -                         | -                      | -               |

**Supplementary Table S2: Patient characteristics of the 11 surveyed Canadian academic EI programs**

| Program Name                                                | Early Psychosis Treatment Service (Calgary) | EPI (Victoria) | NSEPP (Halifax) | TNT (Chatham) | The Phoenix Program (Oakville) | PEPP - London       | CNDV (Quebec City) | Clinique JAP (Montreal) | PEP I.U.S.M.M. (Montreal) | PEPP - MUHC (Montreal) | PEPP -Montreal |
|-------------------------------------------------------------|---------------------------------------------|----------------|-----------------|---------------|--------------------------------|---------------------|--------------------|-------------------------|---------------------------|------------------------|----------------|
| Referrals per year                                          | 150                                         | 95             | 135             | 50            | 20                             | 80                  | 80                 | 90                      | 155                       | 30-35                  | 156            |
| Accepted new cases per year                                 | 125 (83%)                                   | 90 (95%)       | 75 (55%)        | 30 (60%)      | 15 (75%)                       | 60 (75%)            | 60 (75%)           | 67 (74%)                | 140 (90%)                 | 20-25 (69%)            | 55 (35%)       |
| Accepted new cases per year per year per 100 000 population | 9.6                                         | 22.5           | 15.0            | 25.0          | 10.0                           | 15.0                | 10.0               | 29.8                    | 37.8                      | 15.0                   | 13.8           |
| Average age at admission                                    | 25.6                                        | 22             | 24              | 28            | 22.5                           | 21                  | 22-23              | 23.4                    | 22.7                      | 22                     | 23.5           |
| % studying at admission                                     | 30%                                         | 25%            | 50%             | 12%           | 39%                            | 47% (study or work) | 10%                | 16.4%                   | 17.4%                     | 47%                    | 14.7%          |
| % working at admission                                      | 18%                                         | 13%            | 50%             | 18%           | 26%                            |                     | 10%                | 27.8%                   | 22.8%                     | 16%                    | 21.1%          |
| % living with their family at admission                     | N/A                                         | 75%            | 60%             | 54%           | 79%                            | N/A                 | 50%                | 29.9%                   | 61.2%                     | 49%                    | 68.7%          |
| % living independently at admission                         | N/A                                         | 25%            | 40%             | 35%           | 21%                            | N/A                 | 40%                | 57.2%                   | 34.2%                     | 31%                    | 29.6%          |
| Visible minorities (%)                                      | 25%                                         | 10%            | 30%             | 10%           | 15%                            | 15%                 | 20%                | 33%                     | 40%                       | 25%                    | 35%            |
| First Nation (%)                                            | 5%                                          | 10%            | 5%              | 10%           | 0%                             | 5%                  | 2%                 | 0%                      | 0%                        | 0%                     | 1%             |
| First-generation / Second-generation immigrants (%)         | 25% / N/A                                   | 10% / N/A      | 10% / N/A       | 10% / 25%     | 15% / 20%                      | 10% / N/A           | 15% / 5%           | 25% / N/A               | 42% / N/A                 | 40% / 25%              | 18% / 48%      |
| Length of prior use of ATP medication at time of referral:  |                                             |                |                 |               |                                |                     |                    |                         |                           |                        |                |
| <1 month                                                    | 25%                                         | 80%            | 65%             | 40%           | 80%                            | 95%                 | 40%                | 35%                     | N/A                       | 90%                    | 3% (?)         |
| 1 to 3 months                                               | 65%                                         | 15%            | 25%             | 20%           | 10%                            | 5%                  | 40%                | 35%                     | N/A                       | 10%                    | 1% (?)         |
| 3 to 6 months                                               | 5%                                          | 5%             | 10%             | 20%           | 10%                            | 0%                  | 15%                | 20%                     | N/A                       | 0%                     | 0%             |
| >6 months                                                   | 5%                                          | 0%             | 0%              | 20%           | 0%                             | 0%                  | 5%                 | 10%                     | N/A                       | 0%                     | 0%             |

**Supplementary Table S3: Summary of the different clinical guidelines**

| SOURCE OF GUIDELINES / RECOMMENDATIONS                                              | BRITISH COLUMBIA <sup>1</sup>                                            | ONTARIO <sup>2</sup>                                   | NOVA SCOTIA <sup>3</sup> | NEW BRUNSWICK <sup>4</sup>                                   | IRIS/NHS (UK) <sup>5</sup>                                                                                                                                            | NEW ZEALAND <sup>6</sup> | AUSTRALIA <sup>7</sup> | ITALY <sup>8</sup> | NICE <sup>9</sup> | - ARTICLE : "INTERNATIONAL GUIDELINES" BJP <sup>10</sup> | ARTICLE : ESSENTIAL EVIDENCE-BASED COMPONENTS... <sup>11</sup> |
|-------------------------------------------------------------------------------------|--------------------------------------------------------------------------|--------------------------------------------------------|--------------------------|--------------------------------------------------------------|-----------------------------------------------------------------------------------------------------------------------------------------------------------------------|--------------------------|------------------------|--------------------|-------------------|----------------------------------------------------------|----------------------------------------------------------------|
| PROGRAM CHARACTERISTICS                                                             |                                                                          |                                                        |                          |                                                              |                                                                                                                                                                       |                          |                        |                    |                   |                                                          |                                                                |
| Admission criteria                                                                  |                                                                          |                                                        |                          |                                                              |                                                                                                                                                                       |                          |                        |                    |                   |                                                          |                                                                |
| Age range                                                                           | 13-35                                                                    | 14-35                                                  | -                        | Up to 30                                                     | 14-35, with some flexibility (12-36)                                                                                                                                  | -                        | -                      | -                  | 14-35             | -                                                        | -                                                              |
| Length of psychosis prior to tx                                                     | First 5 years of illness and no previous appropriate treatment           | No previous appropriate treatment                      | -                        | 2 years including prodromal sx                               | Flexible in terms of DUP; less than a year of ATP treatment                                                                                                           | -                        | -                      | -                  | -                 | -                                                        | -                                                              |
| Diagnosis included                                                                  | Affective and non-affective psychosis ; substance-induced psychosis      | Experience of psychosis (no specific diagnosis needed) | -                        | Affective and nonaffective psychosis; drug induced psychosis | Tolerate diagnostic uncertainty (manage sx rather than dx)                                                                                                            | -                        | -                      | -                  | -                 | -                                                        | -                                                              |
| Exclusion criteria                                                                  |                                                                          |                                                        |                          |                                                              |                                                                                                                                                                       |                          |                        |                    |                   |                                                          |                                                                |
| Inclusion of patients with comorbidities such as epilepsy, developmental disorders? | Yes (not if psychosis is a result of toxicity, brain injury or dementia) | Yes                                                    | Yes                      |                                                              | Yes (exclusion of some conditions that might not be best treated by EIS (Borderline PD with psychotic sx, neurological conditions with transient psychotic symptoms)) | -                        | -                      | -                  | -                 | -                                                        | -                                                              |
| Inclusion of patients with comorbid substance use disorders?                        | Yes                                                                      | Yes                                                    | -                        | Yes                                                          | Yes                                                                                                                                                                   | Yes                      | Yes                    | -                  | -                 | -                                                        | Yes                                                            |
| Discharge                                                                           |                                                                          |                                                        |                          |                                                              |                                                                                                                                                                       |                          |                        |                    |                   |                                                          |                                                                |

| SOURCE OF GUIDELINES / RECOMMENDATIONS         | BRITISH COLUMBIA <sup>1</sup>                                                                                                      | ONTARIO <sup>2</sup>               | NOVA SCOTIA <sup>3</sup>                | NEW BRUNSWICK <sup>4</sup>           | IRIS/NHS (UK) <sup>5</sup>                                                                             | NEW ZEALAND <sup>6</sup>             | AUSTRALIA <sup>7</sup> | ITALY <sup>8</sup>                                | NICE <sup>9</sup>                       | - ARTICLE : "INTERNATIONAL GUIDELINES" BJP <sup>10</sup> | ARTICLE : ESSENTIAL EVIDENCE-BASED COMPONENTS... <sup>11</sup> |
|------------------------------------------------|------------------------------------------------------------------------------------------------------------------------------------|------------------------------------|-----------------------------------------|--------------------------------------|--------------------------------------------------------------------------------------------------------|--------------------------------------|------------------------|---------------------------------------------------|-----------------------------------------|----------------------------------------------------------|----------------------------------------------------------------|
| Criteria for discharge                         | Not engaging in the program shouldn't automatically lead to discharge; patients can be discharged if EIS are no longer appropriate | -                                  | -                                       |                                      | Failure to take medication, continuing substance misuse or non attendance should not lead to discharge | -                                    | -                      | -                                                 | -                                       | -                                                        | -                                                              |
| Duration of treatment program                  | Available for at least 3 years                                                                                                     | 3 years                            | 2 to 5 years                            | Up to 2 years                        | At least 3 years                                                                                       | -                                    | -                      | -                                                 | Up to 3 years                           | Up to 5 years                                            | Minimum of 3 years; ideally 5 years                            |
| Model of care                                  | Multidisciplinary<br>Centralized                                                                                                   | Case management / care coordinator | Multidisciplinary<br>Continuity of care | Multidisciplinary<br>Case management | Multidisciplinary<br>Case management                                                                   | Multidisciplinary<br>Case management | Case management        | Domiciliation<br>Flexibility<br>Multidisciplinary | Multidisciplinary<br>Continuity of care | Continuity of care for at least the first 18 months      | -                                                              |
| Specific hospital beds                         | Yes                                                                                                                                | -                                  | -                                       |                                      | Yes                                                                                                    | Yes                                  | Yes                    |                                                   | Yes                                     | Yes                                                      | -                                                              |
| Staffing                                       | Psychiatrist on team (rural areas: access to psych consultation)                                                                   | -                                  | -                                       |                                      | -                                                                                                      | Psychiatrist<br>Care manager         | -                      |                                                   | -                                       | -                                                        | Psychiatrist as part of team                                   |
| Patients : case manager ratio                  | Maximum 20 : 1 (patients: clinical staff)                                                                                          | -                                  | -                                       |                                      | 12 to 15 : 1                                                                                           | 10 to 15 : 1                         | -                      |                                                   | -                                       | -                                                        | -                                                              |
| Services for patients at UHR for psychosis?    | Yes                                                                                                                                | No                                 | -                                       |                                      | Yes                                                                                                    | Yes                                  | Yes                    | Yes                                               | Yes                                     | Yes                                                      | -                                                              |
| Use of community treatment orders if necessary | -                                                                                                                                  | -                                  | -                                       |                                      | -                                                                                                      | -                                    | Yes                    | -                                                 | -                                       | Yes                                                      | -                                                              |
| Treatment / therapies offered to patients      | Psychoeducation<br>CBT                                                                                                             | Psychoeducation<br>CBT             | Psychoeducation<br>-                    | Psychoeducation                      | Psychoeducation<br>CBT                                                                                 | Psychoeducation<br>CBT               | Psychoeducation<br>CBT | -<br>CBT                                          | -<br>CBT                                | -<br>-                                                   | Psychoeducation<br>-                                           |

| SOURCE OF GUIDELINES / RECOMMENDATIONS   | BRITISH COLUMBIA <sup>1</sup>                                        | ONTARIO <sup>2</sup>                  | NOVA SCOTIA <sup>3</sup>                     | NEW BRUNSWICK <sup>4</sup> | IRIS/NHS (UK) <sup>5</sup>                                               | NEW ZEALAND <sup>6</sup>              | AUSTRALIA <sup>7</sup>                                                                  | ITALY <sup>8</sup>                        | NICE <sup>9</sup>                                           | - ARTICLE : "INTERNATIONAL GUIDELINES" BJP <sup>10</sup> | ARTICLE : ESSENTIAL EVIDENCE-BASED COMPONENTS... <sup>11</sup>     |
|------------------------------------------|----------------------------------------------------------------------|---------------------------------------|----------------------------------------------|----------------------------|--------------------------------------------------------------------------|---------------------------------------|-----------------------------------------------------------------------------------------|-------------------------------------------|-------------------------------------------------------------|----------------------------------------------------------|--------------------------------------------------------------------|
|                                          | Psychosocial interventions<br>Evidence-based psychological therapies | Psychosocial interventions            | -                                            |                            | Psychosocial interventions                                               | Psychosocial interventions            | Psychosocial interventions<br>Milieu therapy<br>CRT<br>Supportive psychodynamic therapy | -                                         | Psychosocial interventions                                  | Psychosocial interventions                               | Psychosocial interventions                                         |
|                                          | Educational / vocational plan                                        | Educational / vocational plan         | -                                            |                            | Educational / vocational plan                                            | Educational / vocational plan         | Educational / vocational plan                                                           | -                                         | Educational / vocational plan and support                   | Enhancement of professional skills                       | Vocational plan and supported employment                           |
|                                          | -                                                                    | -                                     | -                                            |                            | -                                                                        | -                                     | Group programs                                                                          | -                                         | -                                                           | -                                                        | -                                                                  |
|                                          | -                                                                    | -                                     | -                                            |                            | -                                                                        | -                                     | Supportive therapy                                                                      | -                                         | -                                                           | -                                                        | -                                                                  |
|                                          | -                                                                    | -                                     | -                                            |                            | -                                                                        | -                                     | Befriending                                                                             | -                                         | -                                                           | -                                                        | -                                                                  |
|                                          | -                                                                    | Crisis intervention                   | -                                            |                            | -                                                                        | -                                     | -                                                                                       | -                                         | Crisis plan                                                 | Crisis plan                                              | Crisis intervention                                                |
|                                          | -                                                                    | Treatment of comorbid substance abuse | -                                            |                            | -                                                                        | Treatment of comorbid substance abuse | Treatment of comorbid substance abuse                                                   | -                                         | -                                                           | -                                                        | Treatment of comorbid substance abuse                              |
|                                          | -                                                                    | -                                     | -                                            |                            | -                                                                        | -                                     | -                                                                                       | -                                         | -                                                           | -                                                        | -                                                                  |
|                                          | -                                                                    | -                                     | -                                            |                            | -                                                                        | -                                     | -                                                                                       | Social skills training                    | -                                                           | -                                                        | -                                                                  |
|                                          |                                                                      | Recreation                            |                                              |                            |                                                                          |                                       |                                                                                         |                                           | Art therapies                                               |                                                          |                                                                    |
| Family intervention services offered     | Psychoeducation<br>Other specialized interventions if needed         | Psychoeducation<br>Support groups     | Psychoeducation<br>Support<br>Support groups | Psychoeducation            | Psychoeducation<br>Family therapy<br>Support group<br>Referral if needed | Psychoeducation<br>Support            | Psychoeducation<br>Support<br>Referral to specialists if needed                         | Single family psychoeducational treatment | Psychoeducation<br>Single or multiple Families intervention | Multi-family groups<br>Support<br>Advice                 | Multi-family group psychoeducation<br>Group family psychoeducation |
| Outreach services                        | Yes                                                                  | Yes                                   | Yes                                          | Yes                        | Yes                                                                      | Yes                                   | Yes                                                                                     | -                                         | -                                                           | -                                                        | yes                                                                |
| Formal agreements with external services | Yes                                                                  | -                                     | Yes                                          | Yes                        | -                                                                        | Yes                                   | -                                                                                       | -                                         | Yes                                                         | -                                                        | -                                                                  |

ACCESSIBILITY

| SOURCE OF GUIDELINES / RECOMMENDATIONS                                     | BRITISH COLUMBIA <sup>1</sup>                                     | ONTARIO <sup>2</sup> | NOVA SCOTIA <sup>3</sup>                          | NEW BRUNSWICK <sup>4</sup>            | IRIS/NHS (UK) <sup>5</sup>                         | NEW ZEALAND <sup>6</sup> | AUSTRALIA <sup>7</sup>                                                                             | ITALY <sup>8</sup> | NICE <sup>9</sup> | - ARTICLE : "INTERNATIONAL GUIDELINES" BJP <sup>10</sup> | ARTICLE : ESSENTIAL EVIDENCE-BASED COMPONENTS... <sup>11</sup> |
|----------------------------------------------------------------------------|-------------------------------------------------------------------|----------------------|---------------------------------------------------|---------------------------------------|----------------------------------------------------|--------------------------|----------------------------------------------------------------------------------------------------|--------------------|-------------------|----------------------------------------------------------|----------------------------------------------------------------|
| Accepted referral sources                                                  | Multiple                                                          | Multiple             | Multiple                                          |                                       | Multiple                                           | Multiple                 | Multiple                                                                                           | -                  | -                 | Ease of access to assessment                             | -                                                              |
| Timely assessment after referral                                           | First contact on same day as referral<br>Assessment within 1 week | -                    | Yes (24h to 5 working days, depending on urgency) | Yes Within 1 week                     | Yes (From same day to a week depending on urgency) | Yes ("rapid access")     | Yes (48h)                                                                                          | -                  | -                 | Yes                                                      | Yes                                                            |
| Timely contact with clinicians after assessment                            | -                                                                 | -                    | -                                                 |                                       | -                                                  | -                        | Yes With case manager within 5 days of assessment; with psychiatrist within one week of assessment | -                  | -                 | -                                                        | -                                                              |
| Community interventions to increase detection and battle stigma            | Yes                                                               | Yes                  | Yes                                               |                                       | Yes                                                | Yes                      | Yes                                                                                                | -                  |                   | Yes                                                      | Yes                                                            |
| <b>CLINICAL EVALUATION TOOLS</b>                                           |                                                                   |                      |                                                   |                                       |                                                    |                          |                                                                                                    |                    |                   |                                                          |                                                                |
| Comprehensive assessment of new patients                                   | Yes                                                               | Yes                  | Yes                                               | Yes                                   | Yes                                                | Yes                      | Yes                                                                                                | -                  | Yes               | -                                                        | yes                                                            |
| Evaluation for the risk of relapse                                         | Yes                                                               | -                    | -                                                 |                                       | Yes                                                | Yes                      | Yes                                                                                                | -                  | Yes               | yes                                                      | -                                                              |
| <b>EVALUATION</b>                                                          |                                                                   |                      |                                                   |                                       |                                                    |                          |                                                                                                    |                    |                   |                                                          |                                                                |
| Evaluation of quality and outcome of program                               | Yes                                                               | -                    | Yes                                               |                                       | Yes                                                | Yes                      | -                                                                                                  | -                  | -                 | -                                                        | yes                                                            |
| <b>TRAINING AND EDUCATION</b>                                              |                                                                   |                      |                                                   |                                       |                                                    |                          |                                                                                                    |                    |                   |                                                          |                                                                |
| Program provides training and education to individuals outside the program | Yes                                                               | -                    | Yes                                               |                                       | -                                                  | -                        | Yes                                                                                                | -                  | -                 | -                                                        | yes                                                            |
| Continuing education within the program                                    | Yes                                                               | Yes                  | Yes                                               | Yes? (understanding of best practice) | -                                                  | -                        | -                                                                                                  | -                  | -                 | -                                                        | yes                                                            |



| SOURCE OF GUIDELINES / RECOMMENDATIONS | BRITISH COLUMBIA <sup>1</sup> | ONTARIO <sup>2</sup> | NOVA SCOTIA <sup>3</sup> | NEW BRUNSWICK <sup>4</sup> | IRIS/NHS (UK) <sup>5</sup> | NEW ZEALAND <sup>6</sup> | AUSTRALIA <sup>7</sup> | ITALY <sup>8</sup> | NICE <sup>9</sup> | - ARTICLE : "INTERNATIONAL GUIDELINES" BJP <sup>10</sup> | ARTICLE : ESSENTIAL EVIDENCE-BASED COMPONENTS... <sup>11</sup> |
|----------------------------------------|-------------------------------|----------------------|--------------------------|----------------------------|----------------------------|--------------------------|------------------------|--------------------|-------------------|----------------------------------------------------------|----------------------------------------------------------------|
| Research within the program            | Yes                           | Yes                  | -                        |                            | -                          | Yes                      | -                      | -                  | -                 | yes                                                      | -                                                              |

**Abbreviations**

AB: Alberta

ATP: antipsychotic

BC: British Columbia

CNDV: Clinique Notre-Dame des Victoires

CTO: Community Treatment Order

EPI: Early Psychosis Intervention

IRIS: Initiative to Reduce Impact of Schizophrenia

NHS: National Health Service

NICE: National Institute for Health and Care Excellence

NS: Nova Scotia

NSEPP: Nova Scotia Early Psychosis Program

PEP I.U.S.M.M.: Premiers épisodes psychotiques Institut Universitaire en Santé Mentale de Montréal

PEPP: Prevention and Early Intervention Program for Psychosis

PEPP MUHC: Prevention and Early Intervention Program for Psychosis McGill University Health Centre

ON: Ontario

QC: Quebec

TNT: Today Not Tomorrow

UHR: Ultra High Risk

UK: United Kingdom

**References**

1. Ehmann T, Hanson L, Yager J, et al. Standards and guidelines for early psychosis intervention (EPI) programs. British Columbia, Canada: Services Ministry of Health; 2010 [accessed 2016 February 13]. Available from: [http://www.health.gov.bc.ca/library/publications/year/2010/BC\\_EPI\\_Standards\\_Guidelines.pdf](http://www.health.gov.bc.ca/library/publications/year/2010/BC_EPI_Standards_Guidelines.pdf)
2. Ontario Working Group. Program policy framework for early intervention in psychosis. Ontario Working Group; 2004 [accessed 2016 February 13]. Available from: <http://www.nasmhpd.org/sites/default/files/psychosis.pdf>
3. Nova Scotia Department of Health. Nova Scotia provincial service standards for early psychosis. Halifax, Nova Scotia: Nova Scotia Department of Health; 2004.

4. Early Psychosis Services N.B. Administrative guidelines. Fredericton, New Brunswick: Addiction, Mental Health and Primary Health Care Services; 2011.
5. Initiative to Reduce Impact of Schizophrenia (IRIS). IRIS guidelines update. IRIS; 2012 [accessed 2016 February 13]. Available from: <http://www.iris-initiative.org.uk/silo/files/iris-guidelines-update-september-2012.pdf/>
6. Disley B. Early intervention in psychosis guidance note. Mental Health [Internet]. 1999 [cited 2014 December 5];2. Available from: <http://www.hdc.org.nz/media/200643/early%20intervention%20in%20psychosis%20-%20guidance%20note%20march%2099.pdf>
7. EPPIC. Australian clinical guidelines for early psychosis. 2nd ed. Melbourne, Australia: Orygen Youth Health Research Centre; 2010.
8. De Masi S, Sampaolo L, Mele A, et al. The Italian guidelines for early intervention in schizophrenia: development and conclusions. *Early Interv Psychiatry*. 2008;2(4):291-302.
9. National Institute for Health and Care Excellence (NICE). Psychosis and schizophrenia in children and young people—recognition and management. NICE clinical guideline 155/2013. Manchester, England: NICE; 2013.
10. Bertolote J, McGorry P. Early intervention and recovery for young people with early psychosis: consensus statement. *Br J Psychiatry Suppl*. 2005;48:s116-s119.
11. Addington DE, McKenzie E, Norman R, et al. Essential evidence-based components of first-episode psychosis services. *Psychiatr Serv*. 2013;64(5):452-457.
